# Supplementary material
Source: MDPI journal article supplement (https://www.mdpi.com/2073-4344/11/5/561)
Supplement: s1 [file s1]

## Supplementary Materials

# Ni-N-Doped Carbon-Modified Reduced Graphene Oxide Catalysts for Electrochemical CO<sub>2</sub> Reduction Reaction

Fangyuan Wang <sup>1</sup>, Yu Liu <sup>1</sup>, Zhiling Song <sup>2</sup>, Zhichao Miao <sup>1,\*</sup> and Jinping Zhao <sup>1,\*</sup>

<sup>1</sup> School of Chemistry and Chemical Engineering, Shandong University of Technology, Zibo 255000, China; fangyuanwang7@gmail.com (F.W.); Liuyu2515@hotmail.com (Y.L.)

<sup>2</sup> Key Laboratory of Optic-Electric Sensing and Analytical Chemistry for Life Science, MOE, Shandong Key Laboratory of Biochemical Analysis, College of Chemistry and Molecular Engineering, Qingdao University of Science and Technology, Qingdao 266042, China; zhilingsong@qust.edu.cn

\* Correspondence: miaozhichao@sdut.edu.cn (Z.M.); jpzhao@sdut.edu.cn (J.Z.); Tel.: +86-533-278-1664 (Z.M.)

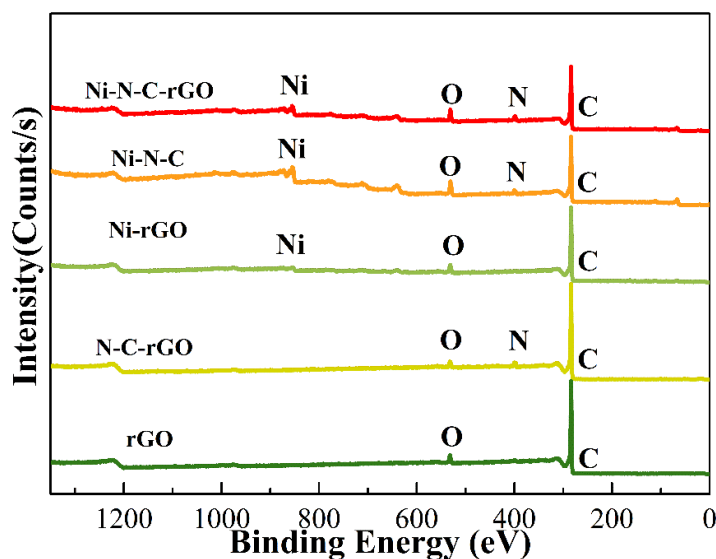

**Figure S1.** XPS spectra of rGO, N-C-rGO, Ni-rGO, Ni-N-C, and Ni-N-C-rGO materials.

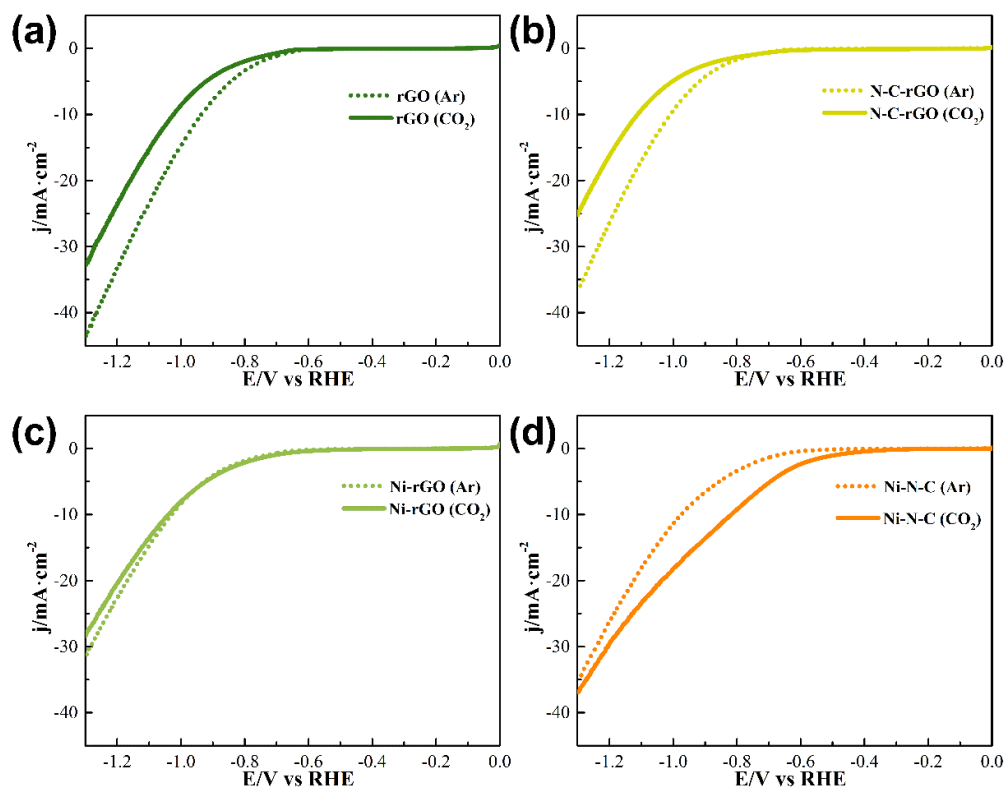

Figure S2. LSV test of (a) rGO, (b) N-C-rGO, (c) Ni-rGO, and (d) Ni-N-C under Ar and  $\text{CO}_2$  atmosphere.

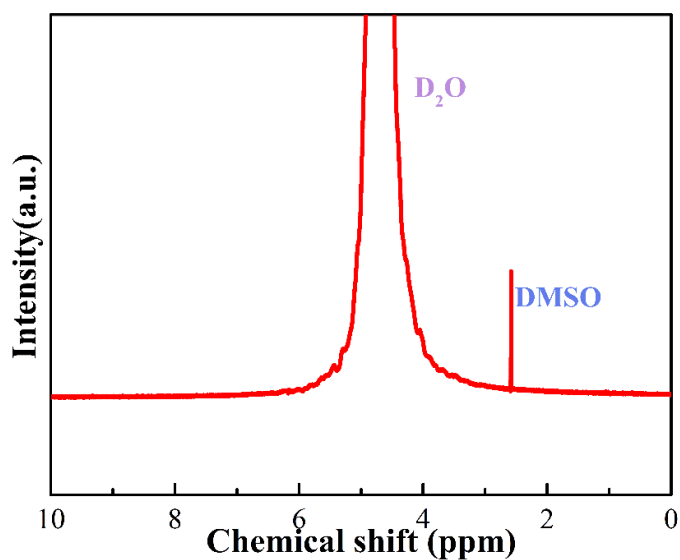

Figure S3.  $^1\text{H}$  NMR of the as-obtained electrolyte solution using the Ni-N-C-rGO catalyst for  $\text{CO}_2$  reduction at  $-0.87$  V for 5 h.

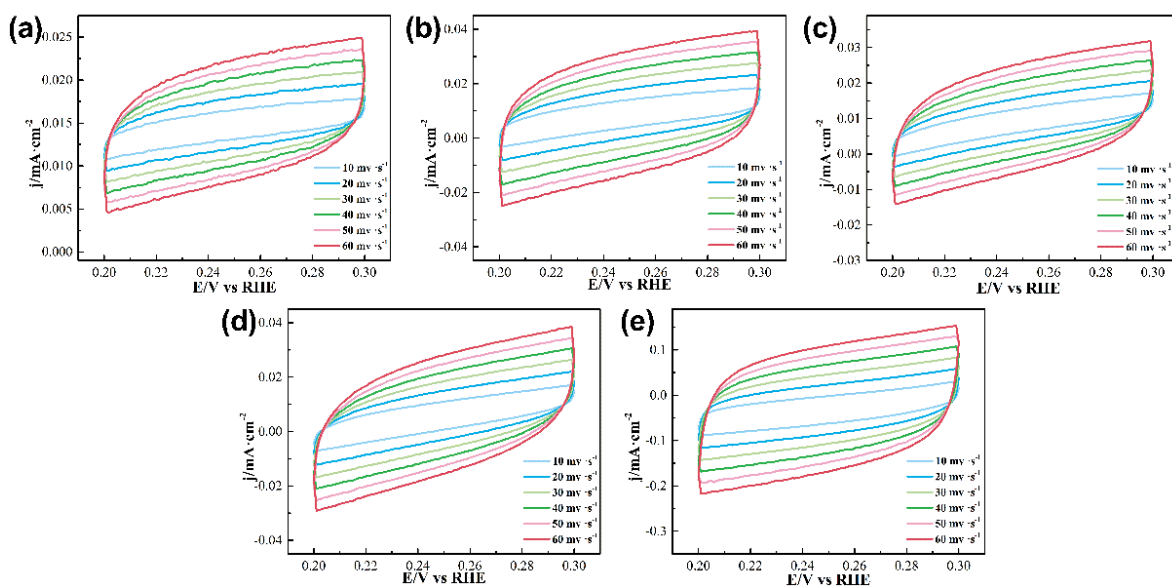

**Figure S4.** Cyclic voltammetry plotted against scan rates: (a) rGO, (b) N-C-rGO, (c) Ni-rGO, (d) Ni-N-C, and (e) Ni-N-C-rGO.

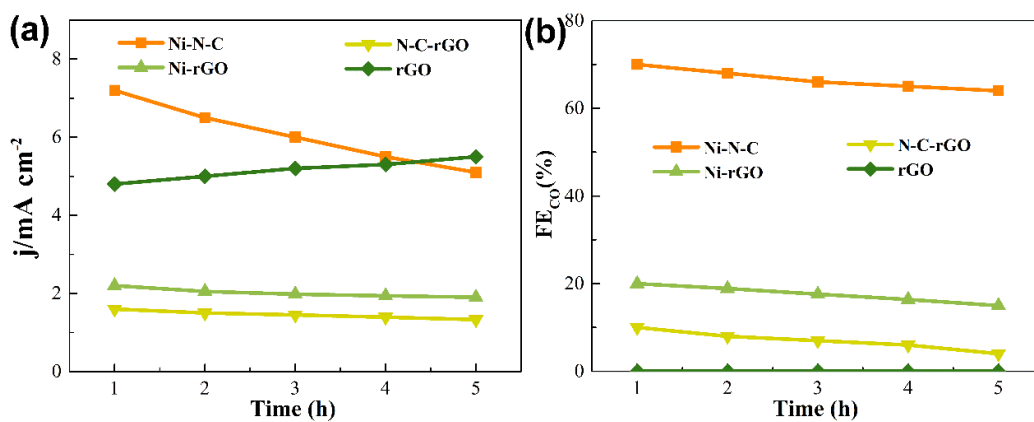

**Figure S5.** Long-term durability: (a) Current density and (b)  $FE_{CO}$  (%) of rGO, N-C-rGO, Ni-rGO, and Ni-N-C at  $-0.87$  V for 5 h.
